# Supplementary material for: Drosophila innate immunity: regional and functional specialization of prophenoloxidases
Source: PubMed Central journal article supplement (PMC4595066; doi:10.1186/s12915-015-0193-6), 2015-10-01

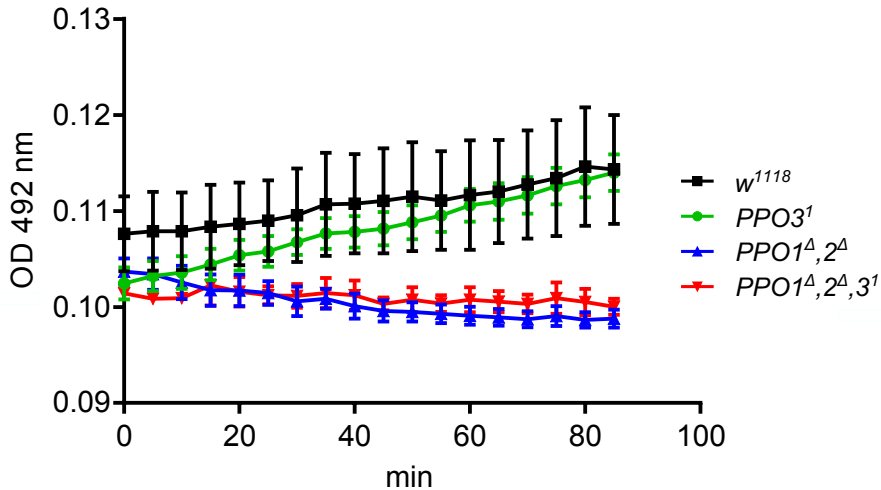

Supplement: 12915_2015_193_MOESM1_ESM.pdf [file 12915_2015_193_MOESM1_ESM.pdf]
